# Supplementary material for: MicroRNA-Sequence Profiling Reveals Novel Osmoregulatory MicroRNA Expression Patterns in Catadromous Eel Anguilla marmorata
Source: PLoS One. 2015 Aug 24;10(8):e0136383. doi: 10.1371/journal.pone.0136383 (PMC4547744; doi:10.1371/journal.pone.0136383)
Supplement: S9 Table — (XLS) [file pone.0136383.s009.xls]

## Sheet: Sheet1
S9 Table. The different expression of conserved miRNA in different salinities.
miRNA name	in BW compared with FW			in SW compared with FW			in SW compared with BW
	logFC	PValue	significant	logFC	PValue	significant	logFC	PValue	significant
ama-miR-99a-5p	-0.45991	0.327911	No	-0.91928	0.0535021	No	-0.59581	0.0669233	No
ama-miR-92b	-0.342101	0.451177	No	-1.14458	0.0185431	Yes	-0.939167	0.00752825	Yes
ama-miR-730	0.209873	1	No	-0.947231	0.682828	No	-1.28628	0.297805	No
ama-miR-727-5p	-1.99425	0.738634	No	-3.67134	0.435944	No	-2.10012	1	No
ama-miR-716b	0.101593	0.860749	No	0.551977	0.494061	No	0.287358	0.667156	No
ama-miR-466k	-5.12548e-15	1	No	2.07518	1	No	2.42292	1	No
ama-miR-454	0.570814	0.132116	No	0.731523	0.0622948	No	0.0220237	0.943746	No
ama-miR-30d	-0.729827	0.0983358	No	-0.946848	0.0412828	No	-0.353278	0.295328	No
ama-miR-29b-3p	0.32672	0.478882	No	0.0173162	0.97998	No	-0.443035	0.30664	No
ama-miR-297	-5.12548e-15	1	No	-5.12548e-15	1	No	0	1	No
ama-miR-26a-5p	0.228888	0.557587	No	-0.0178137	0.967007	No	-0.38362	0.255422	No
ama-miR-24	-0.164663	0.669416	No	0.128978	0.761237	No	0.156653	0.669022	No
ama-miR-221-3p	0.45629	0.232253	No	0.543681	0.169461	No	-0.0500176	0.871817	No
ama-miR-219-5p	-5.12548e-15	1	No	-5.12548e-15	1	No	0	1	No
ama-miR-217	-0.808222	0.491382	No	-1.45167	0.241877	No	-0.653215	0.366878	No
ama-miR-206-3p	0.361759	0.460282	No	-0.581648	0.381801	No	-1.05383	0.0420472	Yes
ama-miR-1a-3p	0.920715	0.0208747	Yes	-0.08485	0.874788	No	-1.13827	0.0134636	Yes
ama-miR-1a-2-5p	-1.55979	1	No	-3.18636	0.594983	No	-2.09903	1	No
ama-miR-19b	-1.23525	0.0116328	Yes	-0.995921	0.039861	Yes	0.102339	0.747072	No
ama-miR-192-3p	-0.790816	0.419669	No	-1.34757	0.356077	No	-0.768858	0.581147	No
ama-miR-190b	1.91908	0.0131817	Yes	1.97165	0.0411633	Yes	-0.125845	0.92667	No
ama-miR-18a-5p	-0.0120117	1	No	0.11582	0.859825	No	-0.00724525	0.991625	No
ama-miR-181b	-0.511672	0.205764	No	-0.027237	0.947703	No	0.346591	0.262267	No
ama-miR-181a	-0.546382	0.273023	No	-0.51394	0.319227	No	-0.105217	0.754551	No
ama-miR-153-3p	0.575757	0.381926	No	0.270607	0.740658	No	-0.455843	0.447255	No
ama-miR-143-5p	0.585688	0.171114	No	0.23564	0.688092	No	-0.478326	0.263782	No
ama-miR-142-3p	0.28851	0.519409	No	0.389772	0.422757	No	-0.0357704	0.918108	No
ama-miR-140-3p	-1.17105	0.0196295	Yes	-1.22226	0.016869	Yes	-0.188693	0.553443	No
ama-miR-139-5p	-1.05602	0.0174598	Yes	-1.06605	0.0284313	Yes	-0.145074	0.707316	No
ama-miR-128	-0.0121777	0.974145	No	-0.418274	0.355955	No	-0.540115	0.160796	No
ama-miR-124-3p	0.0976625	0.903349	No	-5.08591	0.0688796	No	-5.69227	0.0117278	Yes
ama-miR-122	1.42631	0.0886761	No	1.71763	0.0352663	Yes	0.162392	0.87762	No
ama-miR-10b-5p	-0.183826	0.647983	No	-0.212432	0.616974	No	-0.165914	0.623576	No
ama-miR-107-5p	0.886896	0.355874	No	0.979026	0.414683	No	0.0189573	0.959305	No
ama-miR-106a	0.218657	0.569267	No	0.231885	0.596923	No	-0.125505	0.747616	No
ama-miR-101b-5p	-0.25036	0.57278	No	-0.232125	0.675468	No	-0.117752	0.785547	No
